# Supplementary material for: Cocoplum (Chrysobalanus icaco L.) anthocyanins exert anti-inflammatory activity in human colon cancer and non-malignant colon cells
Source: Royal Society of Chemistry journal article supplement (doi:10.1039/c6fo01498d), 2016-12-13
Supplement: c6fo01498d1.pdf [file c6fo01498d1.pdf]

**ELECTRONIC SUPPLEMENTARY MATERIAL OF THE ARTICLE:**  
**Cocoplum (*Chrysobalanus icaco* L.) anthocyanins exert anti-inflammatory  
activity in human colon cancer and non-malignant colon cells**

**Food & Function**

**Vinicius P. Venancio<sup>1,2</sup>, Paula A. Cipriano<sup>1</sup>, Hyemee Kim<sup>1</sup>, Lusânia M. G.  
Antunes<sup>2</sup>, Stephen T. Talcott<sup>1</sup>, Susanne U. Mertens-Talcott<sup>1,\*</sup>**

<sup>1</sup> Department of Nutrition and Food Science, Texas A&M University, College  
Station, Texas 77843-2254, USA

<sup>2</sup> Department of Clinical Analyses, Toxicology and Food Science, University of São  
Paulo, Ribeirão Preto, São Paulo, 14040-903, Brazil

\* Author to whom correspondence should be addressed [phone (979) 458-1819; fax  
(979) 458-3704; e-mail: [smtalcott@tamu.edu](mailto:smtalcott@tamu.edu) ]

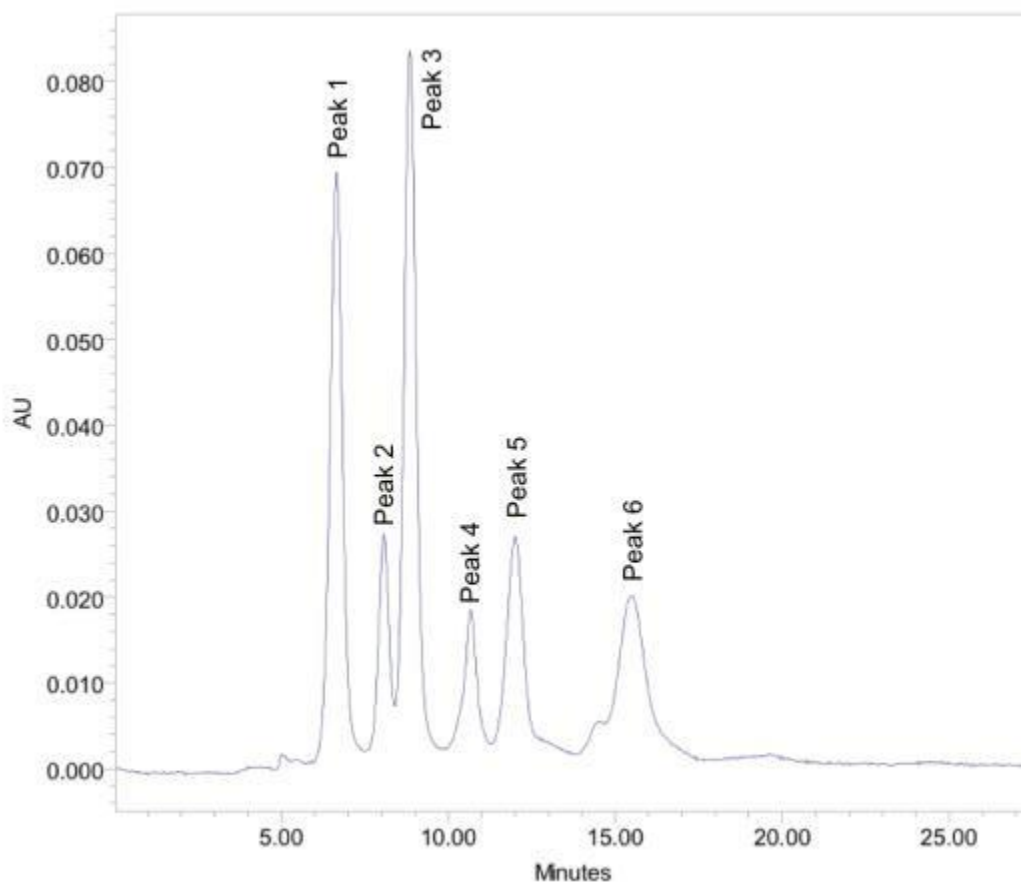

**Supplementary Figure 1** – Anthocyanin chromatographic profile of CP extract. HPLC-ESI-MS<sup>n</sup> analysis allowed the characterization of each peak as follows: delphinidin-3-glucoside (peak 1), cyanidin 3-glucoside (peak 2), petunidin 3-glucoside + delphinidin 3-(6''-acetyl)galactoside or delphinidin 3-(6''-oxaloyl)arabinoside (peak 3), peonidin 3-glucoside (peak 4), petunidin 3-(6''-acetyl)galactoside or petunidin 3-(6''-oxaloyl)arabinoside (peak 5) and peonidin 3-(6''-acetyl)glucoside or peonidin 3-(6''-oxaloyl)arabinoside (peak 6).
